# Supplementary material
Source: Royal Society of Chemistry journal article supplement (doi:10.1039/d5tb02774h)
Supplement: d5tb02774h6.pdf [file d5tb02774h6.pdf]

## Engineering Functionalized Carbon Dots as Biocompatible Nanocarriers for Controlled Doxorubicin Delivery in Cancer Therapy

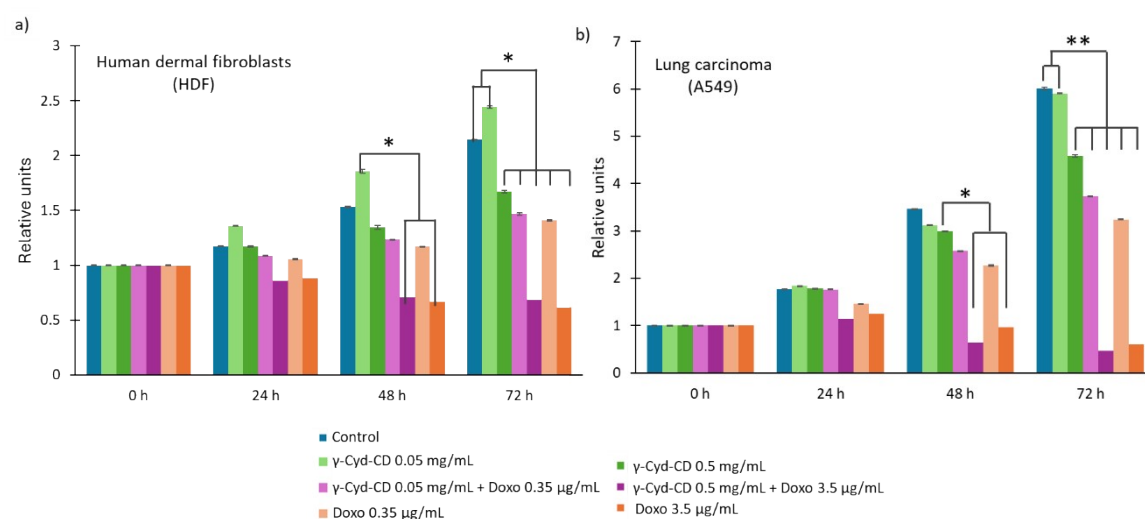

Figure S.1. Cell proliferation assay of  $\gamma$ -Cyd-CD (0.05 and 0.5 mg/mL) loaded and unloaded with doxorubicin (1.1 and 11  $\mu$ g/mL) on a) HDF line and b) A549 cell line. \* indicate the presence of significant differences (\*  $p < 0.05$ , \*\*  $p < 0.01$ , \*\*\*  $p < 0.005$ ).

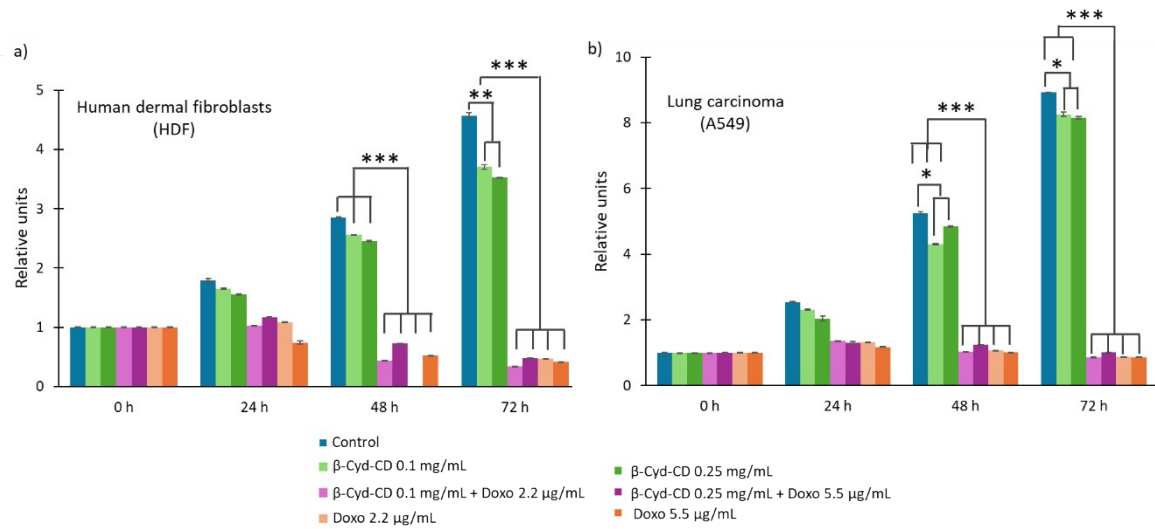

Figure S.2. Cell proliferation assay of  $\beta$ -Cyd-CD (0.1 y 0.25 mg/mL) loaded and unloaded with doxorubicin (2.2 and 5.5  $\mu$ g/mL) on a) HDF line and b) A549 cell line. \* indicate the presence of significant differences (\*  $p < 0.05$ , \*\*  $p < 0.01$ , \*\*\*  $p < 0.005$ ).
